# Supplementary material
Source: PubMed Central journal article supplement (PMC3213276)
Supplement: NIHMS308061-supplement-01.pdf [file NIHMS308061-supplement-01.pdf]

**Figure S1.**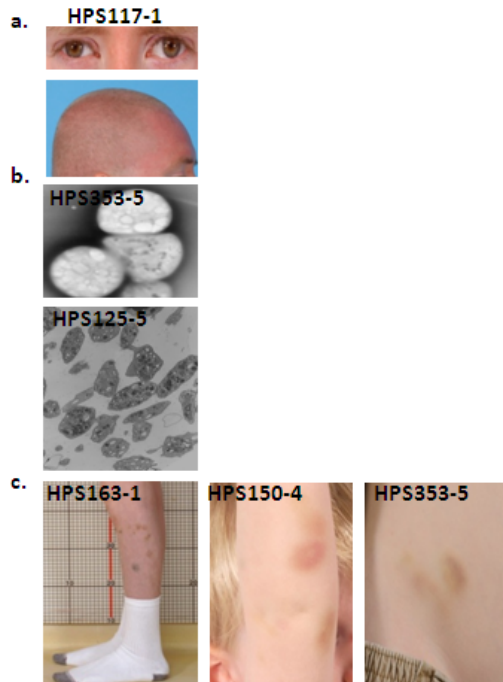

**Figure S1. Clinical and cellular findings among non-Puerto Rican Hispanic HPS patients.** (a) Hypopigmented features of HPS117-1. (b) Representative whole mount (top) and transmission (bottom) EM images of HPS-5 patients (c) Patients exhibit bruised legs (HPS163-1), a bruised arm (HPS150-4), and an abdominal bruise (HPS353-5).
